# Supplementary material for: Identification of essential genes associated with SARS-CoV-2 infection as potential drug target candidates with machine learning algorithms
Source: PubMed Central journal article supplement (PMC10499814; doi:10.1038/s41598-023-42127-9), 2023-09-13
Supplement: 41598_2023_42127_MOESM1_ESM.pdf [file 41598_2023_42127_MOESM1_ESM.pdf]

# Identification of essential genes associated with SARS-CoV-2 infection as potential drug target candidates with machine learning algorithms-Supplementary File

**Golnaz Taheri**<sup>1, 2, \*, +</sup> and **Mahnaz Habibi**<sup>3, +</sup>

<sup>1</sup>Department of Computer and Systems Sciences, Stockholm University, Stockholm, Sweden. <sup>2</sup>Science for Life Laboratory, Stockholm, Sweden.

<sup>3</sup>Department of Mathematics, Qazvin Branch, Islamic Azad University, Qazvin, Iran.

\*Email: golnaz.taheri@dsv.su.se

<sup>+</sup>The authors wish it to be known that, in their opinion, the first and second authors should be regarded as Joint First Authors.

## ABSTRACT

Severe acute respiratory syndrome coronavirus 2 (SARS-CoV-2) requires the fast discovery of effective treatments to fight this worldwide concern. Several genes associated with the SARS-CoV-2, which are essential for its functionality, pathogenesis, and survival, have been identified. These genes, which play crucial roles in SARS-CoV-2 infection, are considered potential therapeutic targets. Developing drugs against these essential genes to inhibit their regular functions could be a good approach for COVID-19 treatment. Artificial intelligence and machine learning methods provide powerful infrastructures for interpreting and understanding the available data and can assist in finding fast explanations and cures. We propose a method to highlight the essential genes that play crucial roles in SARS-CoV-2 pathogenesis. For this purpose, we define eleven informative topological and biological features for the biological and PPI networks constructed on gene sets that correspond to COVID-19. Then, we use three different unsupervised learning algorithms with different approaches to rank the important genes with respect to our defined informative features. Finally, we present a set of 18 important genes related to COVID-19. Materials and implementations are available at: [https://github.com/MahnazHabibi/Gene\\_analysis](https://github.com/MahnazHabibi/Gene_analysis).

**keywords:** Machine learning, Feature selection, SARS-CoV-2.

## Supplementally Table S1

Selected 50 genes with the highest score for each of the three machine learning algorithms: LSFS, RSR, and SPNFSR, and their corresponding scores.

| Rank | Genes    | LSFS scores | Rank | Genes    | RSR scores | Rank | Genes   | SPNFSR scores |
|------|----------|-------------|------|----------|------------|------|---------|---------------|
| 1    | TNF      | 0.1953      | 1    | NTRK1    | 7.43E+50   | 1    | CYP3A4  | 0.1507        |
| 2    | PTGS2    | 0.1525      | 2    | APP      | 7.39E+50   | 2    | ABCB1   | 0.1267        |
| 3    | BCL2     | 0.0979      | 3    | ELAVL1   | 7.23E+50   | 3    | CYP2C9  | 0.0999        |
| 4    | RELA     | 0.0811      | 4    | CUL3     | 7.10E+50   | 4    | CYP2C19 | 0.0801        |
| 5    | IL1B     | 0.0755      | 5    | GRB2     | 7.09E+50   | 5    | CYP3A5  | 0.0744        |
| 6    | TLR4     | 0.0701      | 6    | TP53     | 7.07E+50   | 6    | CYP2C8  | 0.0721        |
| 7    | NFKB1    | 0.0687      | 7    | EGFR     | 7.06E+50   | 7    | CYP2D6  | 0.0702        |
| 8    | IKBKB    | 0.0664      | 8    | XPO1     | 7.04E+50   | 8    | ALB     | 0.0698        |
| 9    | RIPK1    | 0.0659      | 9    | UBC      | 6.99E+50   | 9    | TNF     | 0.0696        |
| 10   | CHUK     | 0.0651      | 10   | NXF1     | 6.98E+50   | 10   | CYP1A2  | 0.0628        |
| 11   | LYN      | 0.0634      | 11   | HSP90AA1 | 6.97E+50   | 11   | AKT1    | 0.0607        |
| 12   | VCAM1    | 0.063       | 12   | FN1      | 6.93E+50   | 12   | IL1B    | 0.0573        |
| 13   | TRAF6    | 0.061       | 13   | COP5     | 6.89E+50   | 13   | IL6     | 0.0566        |
| 14   | PARP1    | 0.0581      | 14   | MCM2     | 6.87E+50   | 14   | PTGS2   | 0.0559        |
| 15   | CSNK2A1  | 0.0577      | 15   | HSP90AB1 | 6.85E+50   | 15   | NFKB1   | 0.0533        |
| 16   | ICAM1    | 0.0473      | 16   | ESR1     | 6.85E+50   | 16   | TP53    | 0.0512        |
| 17   | PRKCB    | 0.0449      | 17   | VCP      | 6.84E+50   | 17   | ABCB11  | 0.0495        |
| 18   | TRAF2    | 0.0447      | 18   | MOV10    | 6.83E+50   | 18   | CD14    | 0.0492        |
| 19   | IKBKG    | 0.0439      | 19   | CTNNB1   | 6.83E+50   | 19   | PPARG   | 0.0485        |
| 20   | BTK      | 0.0432      | 20   | NPM1     | 6.82E+50   | 20   | ABCG2   | 0.0482        |
| 21   | NFKBIA   | 0.042       | 21   | CSNK2A1  | 6.81E+50   | 21   | ITGB3   | 0.0481        |
| 22   | ATM      | 0.0417      | 22   | HNRNPA1  | 6.81E+50   | 22   | APOE    | 0.0478        |
| 23   | CD14     | 0.0408      | 23   | HSPA8    | 6.80E+50   | 23   | TLR4    | 0.0473        |
| 24   | CXCL12   | 0.0395      | 24   | MYC      | 6.79E+50   | 24   | EGF     | 0.047         |
| 25   | IL1R1    | 0.0376      | 25   | ACTB     | 6.79E+50   | 25   | IKBKB   | 0.0466        |
| 26   | CSNK2B   | 0.0361      | 26   | CUL7     | 6.79E+50   | 26   | RHOA    | 0.0461        |
| 27   | BCL2L1   | 0.0358      | 27   | YWHAZ    | 6.77E+50   | 27   | LTA     | 0.0454        |
| 28   | UBE2I    | 0.0342      | 28   | EWSR1    | 6.76E+50   | 28   | CCR5    | 0.0454        |
| 29   | TNFRSF1A | 0.0305      | 29   | VCAM1    | 6.76E+50   | 29   | CYP2E1  | 0.0447        |
| 30   | LTA      | 0.0289      | 30   | RNF2     | 6.73E+50   | 30   | CYP2B6  | 0.0444        |
| 31   | BIRC2    | 0.0284      | 31   | UBE2I    | 6.72E+50   | 31   | CYP1A1  | 0.0437        |
| 32   | MYD88    | 0.0281      | 32   | CUL1     | 6.72E+50   | 32   | MTHFR   | 0.0429        |
| 33   | TNFAIP3  | 0.0271      | 33   | CDK2     | 6.71E+50   | 33   | IL1A    | 0.0428        |
| 34   | LCK      | 0.0253      | 34   | YWHAG    | 6.71E+50   | 34   | ESR1    | 0.0425        |
| 35   | CXCL8    | 0.0252      | 35   | MDM2     | 6.71E+50   | 35   | MMP3    | 0.0423        |
| 36   | PRKCQ    | 0.0247      | 36   | HSPA5    | 6.70E+50   | 36   | CCL2    | 0.0416        |
| 37   | TRAF1    | 0.0243      | 37   | TUBB     | 6.70E+50   | 37   | ICAM1   | 0.0414        |
| 38   | SYK      | 0.0236      | 38   | SNW1     | 6.70E+50   | 38   | VEGFA   | 0.0414        |
| 39   | BIRC3    | 0.0233      | 39   | EP300    | 6.69E+50   | 39   | CCL5    | 0.0409        |
| 40   | PLCG1    | 0.0231      | 40   | BRCA1    | 6.68E+50   | 40   | AGT     | 0.0408        |
| 41   | MAP3K7   | 0.023       | 41   | LMNA     | 6.68E+50   | 41   | DRD2    | 0.0407        |
| 42   | IRAK1    | 0.0226      | 42   | TRAF6    | 6.68E+50   | 42   | VCAM1   | 0.0407        |
| 43   | CSNK2A2  | 0.0219      | 43   | SIRT7    | 6.68E+50   | 43   | MMP9    | 0.0406        |
| 44   | PLCG2    | 0.0214      | 44   | PRKN     | 6.67E+50   | 44   | IL1R1   | 0.0406        |
| 45   | TAB1     | 0.0207      | 45   | OBSL1    | 6.67E+50   | 45   | CXCL12  | 0.0405        |
| 46   | TAB2     | 0.0206      | 46   | HSPA4    | 6.67E+50   | 46   | PTGS1   | 0.0404        |
| 47   | TRAF3    | 0.0202      | 47   | RPA1     | 6.65E+50   | 47   | LDLR    | 0.0403        |
| 48   | CYLD     | 0.0194      | 48   | RPA2     | 6.65E+50   | 48   | EGFR    | 0.0402        |
| 49   | TRIM25   | 0.0188      | 49   | EEF1A1   | 6.64E+50   | 49   | ABCC2   | 0.0401        |
| 50   | XIAP     | 0.0187      | 50   | CCDC8    | 6.63E+50   | 50   | AGTR1   | 0.0399        |

## Supplementally Table S2

The topological and biological feature values for three machine learning algorithms, LSFS, RSR, and SPNFSR.

It is worth noting that our proposed algorithms undergo a random initialization process. To obtain the final feature score, we conducted 50 runs for each algorithm and obtained the average feature values for each one. The average feature values were then used to rank the genes. The table provided showcases the results obtained from a single run of each algorithm.

| Algorithms  | Informative topological features for PPI network |             |          |           | Informative biological features |                        | Informative topological features for biological network |             |          |           |         |
|-------------|--------------------------------------------------|-------------|----------|-----------|---------------------------------|------------------------|---------------------------------------------------------|-------------|----------|-----------|---------|
|             | Degree                                           | Betweenness | Pagerank | Closeness | number of drugs approved        | no. signaling pathways | Weight                                                  | Betweenness | PageRank | Closeness | Entropy |
| LSFS        | 0.8245                                           | 0.9854      | 0.773    | 0.0318    | 0.9922                          | 0.9617                 | 0.7774                                                  | 0.9529      | 0.6724   | 0.5169    | 0.6802  |
| RSR (E*+57) | 0.0929                                           | 0.0933      | 0.2413   | 0.098     | 0.0875                          | 0.097                  | 0.0943                                                  | 0.0898      | 0.096    | 0.099     | 0.091   |
| SPNFSR      | 0.08                                             | 0.54        | 0.09     | 0.01      | 0.61                            | 0.18                   | 0.09                                                    | 0.34        | 0.07     | 0.02      | 0.07    |

## Supplementally Algorithm 1

The LSFS algorithm steps to calculate the score of each gene are described in Algorithm 1. In this algorithm, we considered  $t = 100$  and  $\delta = 5$  respectively.

| Algorithm 1 Laplacian Score for Feature Selection (LSFS)                                                                                                                                                                                                                                                                                                                                                                                                                                                                                                                                                                                                                                                                                                                                                                                                                                                                                                                                                                                                                                                                                                                                                                                                                                                                                                                                                      |
|---------------------------------------------------------------------------------------------------------------------------------------------------------------------------------------------------------------------------------------------------------------------------------------------------------------------------------------------------------------------------------------------------------------------------------------------------------------------------------------------------------------------------------------------------------------------------------------------------------------------------------------------------------------------------------------------------------------------------------------------------------------------------------------------------------------------------------------------------------------------------------------------------------------------------------------------------------------------------------------------------------------------------------------------------------------------------------------------------------------------------------------------------------------------------------------------------------------------------------------------------------------------------------------------------------------------------------------------------------------------------------------------------------------|
| <p><b>Require:</b> Feature matrix <math>X = [x_{ij}]_{m \times n}</math><br/>Parameters <math>t, \delta</math></p> <p>1: Let <math>\vec{p}_i = \langle x_{i1}, \dots, x_{im} \rangle</math> for each sample <math>i</math><br/> 2: Let <math>F_j = [x_{1j}, \dots, x_{mj}]^T</math> for each feature <math>j</math><br/> 3: <b>for</b> <math>i \leftarrow 1</math> to <math>m</math> <b>do</b><br/> 4:     <b>for</b> <math>j \leftarrow 1</math> to <math>m</math> <b>do</b><br/> 5:         <b>if</b> <math> \vec{p}_i - \vec{p}_j  &lt; \delta</math> <b>then</b><br/> 6:             <math>s_{ij} = e^{-\frac{ \vec{p}_i - \vec{p}_j }{t}}</math><br/> 7:             <b>else</b><br/> 8:             <math>s_{ij} = 0</math><br/> 9:             <b>end if</b><br/> 10:         <b>end for</b><br/> 11:     <b>end for</b><br/> 12: <math>S = [s_{ij}]_{m \times m}</math><br/> 13: <math>D = [d_i]_{m \times m}</math>, where <math>d_i = \sum_{k=1}^m s_{ik}</math><br/> 14: <math>L = D - S</math><br/> 15: <math>J = [1, 1, \dots, 1]^T</math><br/> 16: <b>for</b> <math>j \leftarrow 1</math> to <math>n</math> <b>do</b><br/> 17:     <math>\tilde{F}_j = F_j - \frac{F_j^T D J}{J^T D J} J</math><br/> 18:     <math>\zeta_j = \frac{\tilde{F}_j^T L \tilde{F}_j}{\tilde{F}_j^T D \tilde{F}_j}</math><br/> 19:     <math>LS(g_i) = \sum_{i=1}^m x_{ij} \zeta_j</math><br/> 20: <b>end for</b></p> |

## Supplementally Algorithm 2

The RSR algorithm steps to calculate the score of each gene are described in Algorithm 2. In this algorithm, we considered that  $\lambda = 1$ ,  $p = 0.1$  and  $\varepsilon = 0.01$  respectively.

### Algorithm 2 Non-Convex Regularized Self-Representation (RSR)

Require: Feature matrix  $X = [x_{ij}]_{m \times n}$   
Parameters  $\lambda$ ,  $p$  and  $\varepsilon$

- 1: Let  $\vec{p}_i = \langle x_{i1}, \dots, x_{in} \rangle$  for each sample  $i$
- 2: Let  $F_j = [x_{1j}, \dots, x_{mj}]^T$  for each feature  $j$
- 3: Let  $I$  is the identity matrix
- 4: Repeat
- 5: Compute diagonal matrices  $G_W^t = [g_{w,j}^t]_{n \times n}$  where  $g_{w,j}^t = \frac{p}{2} \|w_j^t\|_2^{p-2}$
- 6: Compute diagonal matrices  $G_B^t = [g_{b,i}^t]_{m \times m}$  where  $g_{b,i}^t = \frac{1}{\max\{2 \|\vec{p}_i - \vec{p}_i W^t\|_2, \varepsilon\}}$
- 7:  $W^{t+1} = [w_{ij}]_{n \times n}$  using equation  $W^{t+1} = ((G_W^t)^{-1} X^T G_B^t X + \lambda I)^{-1} (G_W^t)^{-1} X^T G_B^t X$
- 8:  $t = t + 1$
- 9: Until convergence
- 10: **for**  $j \leftarrow 1$  to  $n$  **do**
- 11:      $\zeta_j = \|w^j\|_2$
- 12: **end for**
- 13: **for**  $i \leftarrow 1$  to  $m$  **do**
- 14:      $\text{RSR}(g_i) = \sum_{j=1}^n x_{ij} \zeta_j$
- 15: **end for**

### Supplementally Algorithm 3

The *SPNFSR* algorithm steps to calculate the score of each gene are described in Algorithm 3. In this algorithm, we considered that  $\varepsilon = 0.01$ ,  $\alpha = 0.05$ ,  $\beta=0.05$ ,  $t = 100$  and  $\delta = 5$  respectively.

| <b>Algorithm 3 Structure Preserving Nonnegative Feature Self-Representation (SPNFSR)</b>                                                                                                                                                                                                                                                                                                                                                                                                                                                                                                                                                                                                                                                                                                                                                                                                                                                                                                                                                                                                                                                                                                                                                                                                                                                                                                                                                                                                                                                                                                                                                                                                                                                                                                                                                                                                                                                                                    |
|-----------------------------------------------------------------------------------------------------------------------------------------------------------------------------------------------------------------------------------------------------------------------------------------------------------------------------------------------------------------------------------------------------------------------------------------------------------------------------------------------------------------------------------------------------------------------------------------------------------------------------------------------------------------------------------------------------------------------------------------------------------------------------------------------------------------------------------------------------------------------------------------------------------------------------------------------------------------------------------------------------------------------------------------------------------------------------------------------------------------------------------------------------------------------------------------------------------------------------------------------------------------------------------------------------------------------------------------------------------------------------------------------------------------------------------------------------------------------------------------------------------------------------------------------------------------------------------------------------------------------------------------------------------------------------------------------------------------------------------------------------------------------------------------------------------------------------------------------------------------------------------------------------------------------------------------------------------------------------|
| <p>Require: Feature matrix <math>X = [x_{ij}]_{m \times n}</math><br/> Parameters <math>\alpha, \beta, \delta, t</math></p> <p>1: Let <math>\vec{p}_i = \langle x_{i1}, \dots, x_{in} \rangle</math> for each sample <math>i</math><br/> 2: Let <math>F_j = [x_{1j}, \dots, x_{mj}]^T</math> for each feature <math>j</math><br/> 3: <b>for</b> <math>i \leftarrow 1</math> to <math>m</math> <b>do</b><br/> 4:     <b>for</b> <math>j \leftarrow 1</math> to <math>m</math> <b>do</b><br/> 5:         <b>if</b> <math> \vec{p}_i - \vec{p}_j  &lt; \delta</math> <b>then</b><br/> 6:             <math>s_{ij} = e^{-\frac{ \vec{p}_i - \vec{p}_j ^2}{t}}</math><br/> 7:             <b>else</b><br/> 8:             <math>s_{ij} = 0</math><br/> 9:             <b>end if</b><br/> 10:         <b>end for</b><br/> 11:     <b>end for</b><br/> 12: Initialize sets <math>R_1, Q_1, W_1</math> as identify matrices and <math>N = 1</math><br/> 13: Compute <math>L = (I - S - S^T + SS^T)</math><br/> 14: Compute <math>M^+ = ( M_{ij}  + M_{ij})/2</math> and <math>M^- = ( M_{ij}  - M_{ij})/2</math> and <math>M = M^+ - M^-</math><br/> 15: Repeat<br/> 16: Compute matrix <math>W_{N+1} = [w_{ij}]_{n \times n}</math> using Equation</p> $W_{ij} = W_{ij} \frac{(\alpha M^- W + X^T R X)_{ij}}{((X^T R X + \beta Q + \alpha M^+) W)_{ij}}$ <p>17: Update diagonal matrices <math>R_{N+1}</math> and <math>Q_{N+1}</math> using Equation</p> $r_{ii} = \frac{1}{\max\{2 \ x_i - x_i W\ _2, \varepsilon\}}$ $q_{ii} = \frac{1}{\max\{2 \ w^i\ _2, \varepsilon\}}$ <p>18: <math>N = N + 1</math><br/> 19: Until convergence<br/> 20: <b>for</b> <math>j \leftarrow 1</math> to <math>n</math> <b>do</b><br/> 21:     <math>\zeta_j = \ w^j\ _2</math><br/> 22: <b>end for</b><br/> 23: <b>for</b> <math>i \leftarrow 1</math> to <math>m</math> <b>do</b><br/> 24:     SPNFSR (<math>g_i</math>) = <math>\sum_{j=1}^n x_{ij} \zeta_j</math><br/> 25: <b>end for</b></p> |
